# Supplementary material for: A Novel Method for Identification and Quantification of Consistently Differentially Methylated Regions
Source: PubMed Central journal article supplement (PMC4018258; doi:10.1371/journal.pone.0097513), 2014-05-12

**A**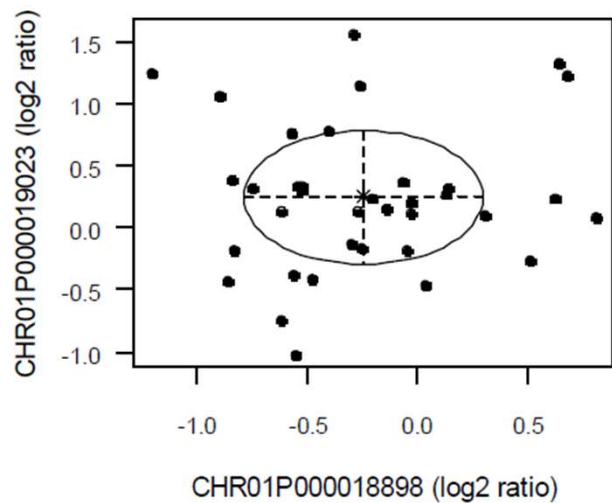**B**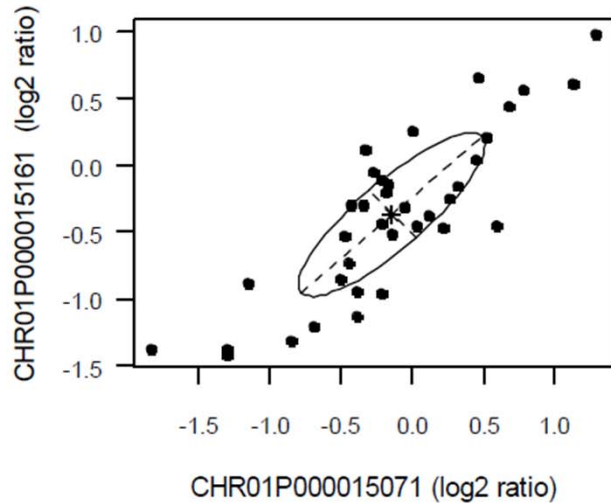**C**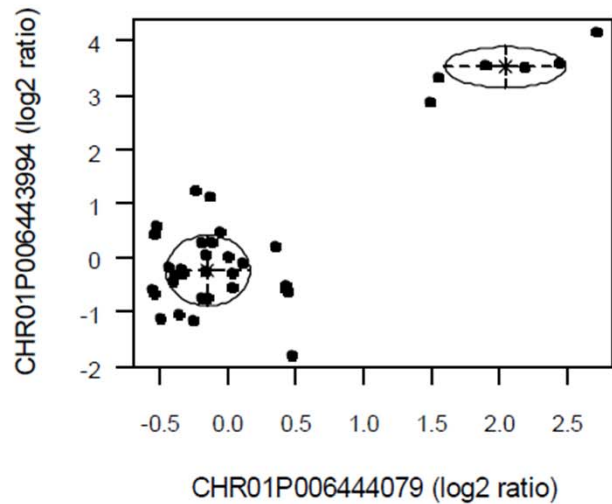**D**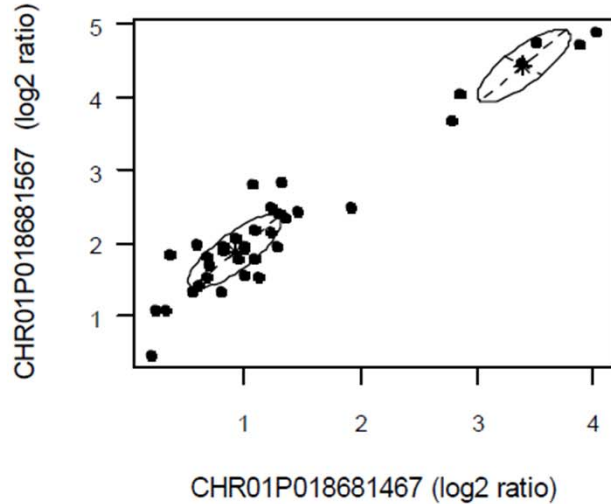

Supplement: pone.0097513.s001.pdf [file pone.0097513.s001.pdf]
