# Supplementary material for: A Novel Method for Identification and Quantification of Consistently Differentially Methylated Regions
Source: PubMed Central journal article supplement (PMC4018258; doi:10.1371/journal.pone.0097513), 2014-05-12

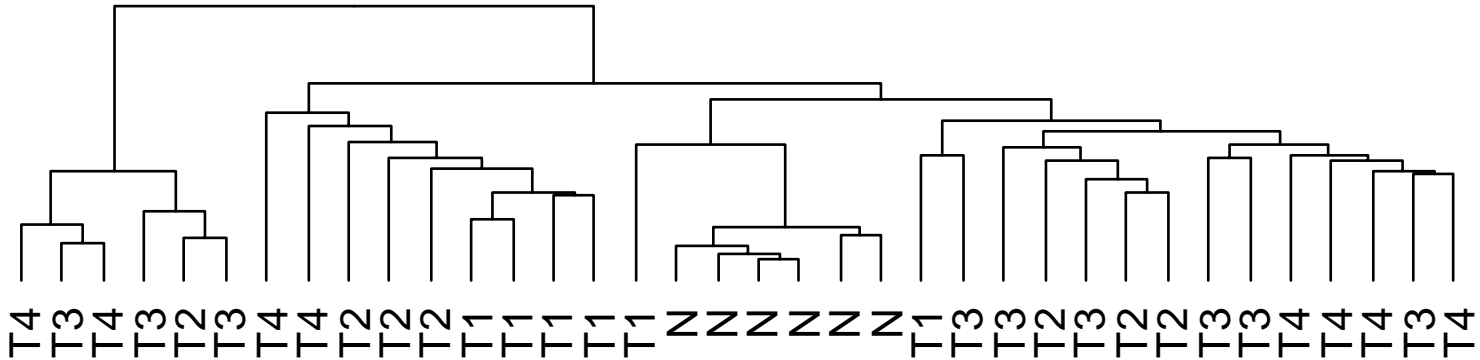

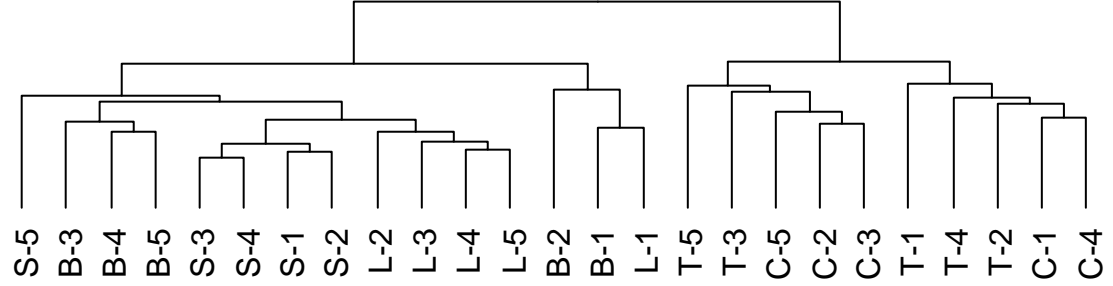

Supplement: pone.0097513.s007.pdf [file pone.0097513.s007.pdf]
