# Supplementary material for: A Novel Method for Identification and Quantification of Consistently Differentially Methylated Regions
Source: PubMed Central journal article supplement (PMC4018258; doi:10.1371/journal.pone.0097513), 2014-05-12
Supplement: pone.0097513.s010.pdf [file pone.0097513.s010.pdf]

|        |        | False positive rate |       |       |       |       |       | Sensitivity |       |       |       |       |       |       |
|--------|--------|---------------------|-------|-------|-------|-------|-------|-------------|-------|-------|-------|-------|-------|-------|
| Method | $\rho$ | MF                  |       |       |       |       |       | MF          |       |       |       |       |       |       |
|        |        | 0.1                 | 0.2   | 0.4   | 0.6   | 0.8   | 1     | 0.1         | 0.2   | 0.4   | 0.6   | 0.8   | 1     |       |
| ICDMR  | 0      | 0.050               | 0.050 | 0.051 | 0.050 | 0.049 | 0.048 | 0.997       | 0.999 | 0.999 | 0.999 | 0.999 | 0.999 | 0.999 |
|        | 0.3    | 0.052               | 0.051 | 0.052 | 0.052 | 0.053 | 0.051 | 0.994       | 0.999 | 0.999 | 0.999 | 0.999 | 0.999 | 0.998 |
|        | 0.5    | 0.057               | 0.056 | 0.054 | 0.056 | 0.055 | 0.052 | 0.984       | 0.998 | 0.998 | 0.999 | 0.999 | 0.999 | 0.996 |
|        | 0.7    | 0.067               | 0.067 | 0.064 | 0.067 | 0.063 | 0.061 | 0.903       | 0.990 | 0.993 | 0.992 | 0.991 | 0.991 | 0.956 |
| QDMR   | 0      | 0.049               | 0.049 | 0.049 | 0.049 | 0.049 | 0.049 | 0.999       | 1.000 | 1.000 | 1.000 | 1.000 | 1.000 | 1.000 |
|        | 0.3    | 0.091               | 0.091 | 0.092 | 0.091 | 0.090 | 0.090 | 0.999       | 1.000 | 1.000 | 1.000 | 1.000 | 1.000 | 1.000 |
|        | 0.5    | 0.248               | 0.247 | 0.246 | 0.248 | 0.245 | 0.246 | 0.999       | 1.000 | 1.000 | 1.000 | 1.000 | 1.000 | 1.000 |
|        | 0.7    | 0.731               | 0.732 | 0.731 | 0.731 | 0.732 | 0.730 | 1.000       | 1.000 | 1.000 | 1.000 | 1.000 | 1.000 | 1.000 |
| t-test | 0      | 0.050               | 0.049 | 0.049 | 0.049 | 0.049 | 0.049 | 0.079       | 0.612 | 0.999 | 1.000 | 1.000 | 1.000 | 1.000 |
|        | 0.3    | 0.049               | 0.049 | 0.049 | 0.050 | 0.049 | 0.049 | 0.082       | 0.591 | 0.999 | 1.000 | 1.000 | 1.000 | 1.000 |
|        | 0.5    | 0.049               | 0.049 | 0.050 | 0.049 | 0.050 | 0.050 | 0.083       | 0.552 | 0.999 | 1.000 | 1.000 | 1.000 | 1.000 |
|        | 0.7    | 0.049               | 0.050 | 0.049 | 0.049 | 0.049 | 0.049 | 0.083       | 0.470 | 0.996 | 1.000 | 1.000 | 1.000 | 1.000 |
| WRST   | 0      | 0.049               | 0.049 | 0.049 | 0.049 | 0.049 | 0.049 | 0.061       | 0.194 | 0.743 | 0.999 | 1.000 | 1.000 | 1.000 |
|        | 0.3    | 0.049               | 0.049 | 0.049 | 0.049 | 0.049 | 0.049 | 0.062       | 0.192 | 0.748 | 0.999 | 1.000 | 1.000 | 1.000 |
|        | 0.5    | 0.049               | 0.049 | 0.049 | 0.050 | 0.049 | 0.049 | 0.061       | 0.192 | 0.745 | 0.999 | 1.000 | 1.000 | 1.000 |
|        | 0.7    | 0.049               | 0.049 | 0.048 | 0.049 | 0.048 | 0.049 | 0.061       | 0.189 | 0.743 | 0.999 | 1.000 | 1.000 | 1.000 |
